# Supplementary material for: Enhanced activity of H2O2-treated copper(ii) oxide nanostructures for the electrochemical evolution of oxygen
Source: Royal Society of Chemistry journal article supplement (doi:10.1039/c5cy00861a), 2015-08-13
Supplement: c5cy00861a1.pdf [file c5cy00861a1.pdf]

# Enhanced activity of H<sub>2</sub>O<sub>2</sub>-treated copper(II) oxide nanostructures for the electrochemical evolution of oxygen

Albertus D. Handoko, Suzi Deng, Yilin Deng, Andy Wing Fai Cheng, Kuang Wen Chan, Hui Ru

Tan, Yanlin Pan, Eng Soon Tok, Chong Haur Sow and Boon Siang Yeo

## Supplementary Information

### 1. Characterisation of Cu<sub>2</sub>O nanostructure precursors and H<sub>2</sub>O<sub>2</sub>-treated CuO nanostructures

#### 1.1. Scanning electron microscopy of Cu<sub>2</sub>O nanostructures

Nanostructured Cu<sub>2</sub>O precursors consist of nanowire networks that extend into the micrometres regime (Fig S1a). Transmission electron microscopy (TEM) images indicate that the networks were formed by interpenetrating/branching growth of individual nanowires 50-100 nm in diameters (Fig S1b). The nanostructures were verified by selected area electron diffraction (SAED) to be single-crystalline Cu<sub>2</sub>O (insets of Fig S1b). Analysis of the *d*-spacings in the high resolution TEM (HRTEM) images showed well-resolved (0 0 1) lattice planes of Cu<sub>2</sub>O (Fig S1c).

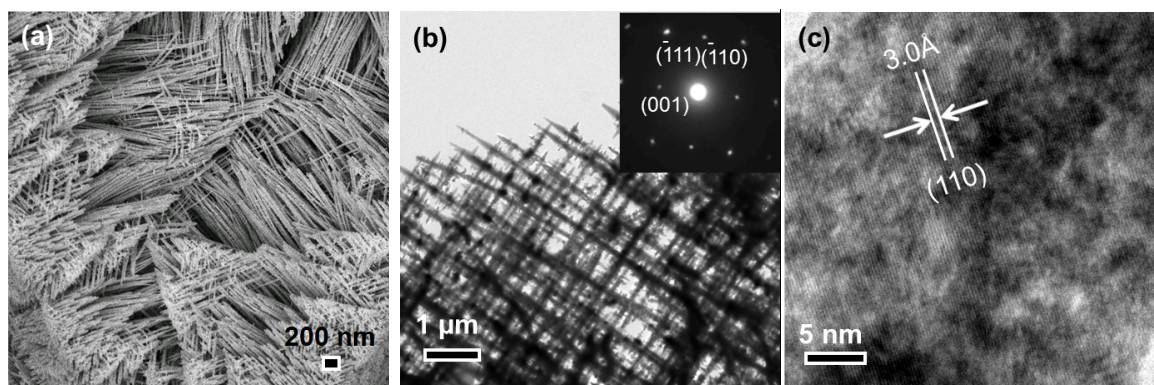

**Figure S1:** (a) Scanning and (b-c) transmission electron microscopy images of Cu<sub>2</sub>O nanostructures at different magnifications. Selected area electron diffraction pattern shown in the inset in (b) and *d*-spacing analysis in the high resolution image (c) confirms the chemical identity of the precursor as Cu<sub>2</sub>O.

## 1.2. Quantitative XRD analysis of various Cu<sub>2</sub>O and CuO powders used in this work.

To obtain lattice parameter data using the Bruker Topas 4.2 platform, X-ray diffraction data was treated with whole pattern decomposition analysis as described by Pawley<sup>1</sup> and Toraya<sup>2</sup>. Only the most robust parameters such as lattice parameters, angles and crystallite size were refined. The crystallite size reported here refers to the volume-weighted mean crystallite size, extracted from the integral breadth of each line profile. Zero error and instrumental broadening of the diffractometer were considered. The literature was consulted to obtain reference cell data of Cu<sub>2</sub>O,<sup>3</sup> CuO,<sup>4</sup> Cu.<sup>5</sup> The refinement results for the various Cu<sub>2</sub>O and CuO powder samples are presented in sections 1.2.1. to 1.2.3. The blue, red and grey lines represent observed XRD data, calculated pattern from the reference data, and difference plot respectively.

### 1.2.1. Cu<sub>2</sub>O nanostructures

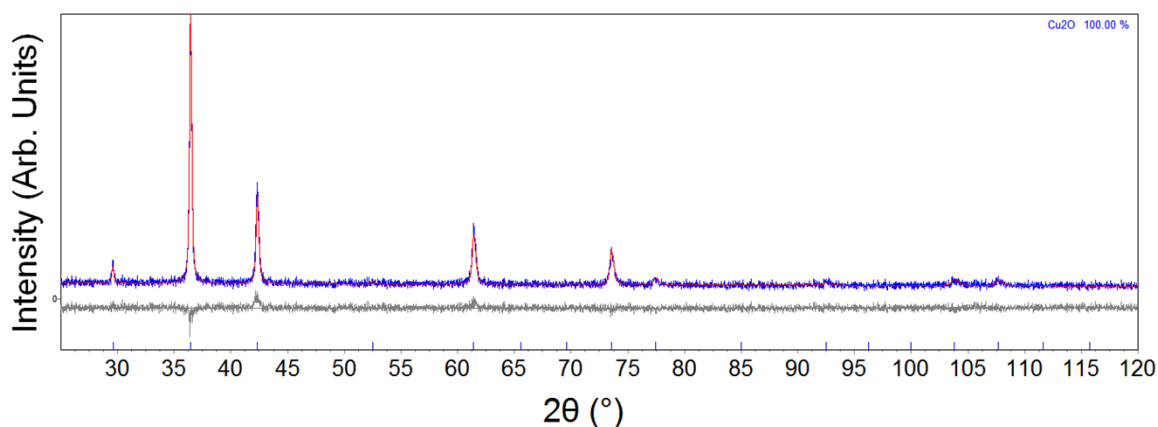

**Figure S2:** X-ray diffraction data of Cu<sub>2</sub>O nanostructures after whole powder pattern decomposition fitting.

**Table S1:** Whole pattern decomposition fitting results for Cu<sub>2</sub>O nanostructures.

| Phase Name                            | Cu <sub>2</sub> O (100%) |                      |
|---------------------------------------|--------------------------|----------------------|
| R-Bragg                               | 4.113                    |                      |
| Space group                           | Pn-3m                    |                      |
| Cell Volume                           | 77.854(45)               | (Å <sup>3</sup> )    |
| Crystallite size (Lvol-IB)            | 27.67(86)                | (nm)                 |
| Crystal Linear Absorption Coefficient | 288.97(17)               | (1/cm)               |
| Crystal Density                       | 6.1040(35)               | (g/cm <sup>3</sup> ) |
| Lattice Parameters                    | a                        | 4.26999(82) (Å)      |

### 1.2.2. H<sub>2</sub>O<sub>2</sub>-treated CuO nanostructures

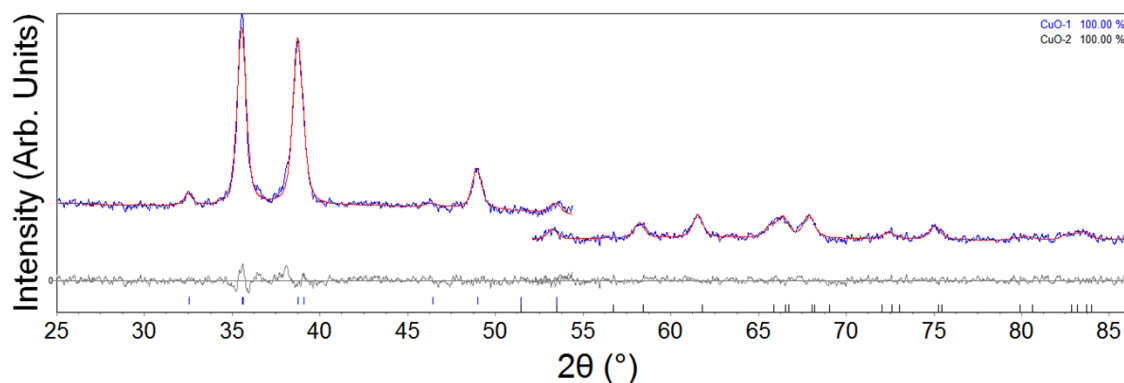

**Figure S3:** X-ray diffraction data of H<sub>2</sub>O<sub>2</sub>-treated CuO nanostructures after whole powder pattern decomposition fitting. The diffraction data was collected with Bruker Discover D8 with GADDS area detector at two different detector positions, resulting in different background intensity levels.

**Table S2:** Whole pattern decomposition fitting results for H<sub>2</sub>O<sub>2</sub>-treated CuO nanostructures.

| Phase Name                            | CuO (100%) |                      |     |
|---------------------------------------|------------|----------------------|-----|
| R-Bragg                               | 0.799      |                      |     |
| Space group                           | C1c1       |                      |     |
| Cell Volume                           | 81.208(30) | (Å <sup>3</sup> )    |     |
| Crystallite size (Lvol-IB)            | 12.61(11)  | (nm)                 |     |
| Crystal Linear Absorption Coefficient | 284.55(11) | (1/cm)               |     |
| Crystal Density                       | 6.5062(24) | (g/cm <sup>3</sup> ) |     |
| Lattice Parameters                    | a          | 4.67548(53)          | (Å) |
|                                       | b          | 3.43263(78)          | (Å) |
|                                       | c          | 5.1275(15)           | (Å) |
|                                       | β          | 99.3141(97)          | °   |

### 1.2.3. Commercial Cu<sub>2</sub>O (Alfa Aesar)

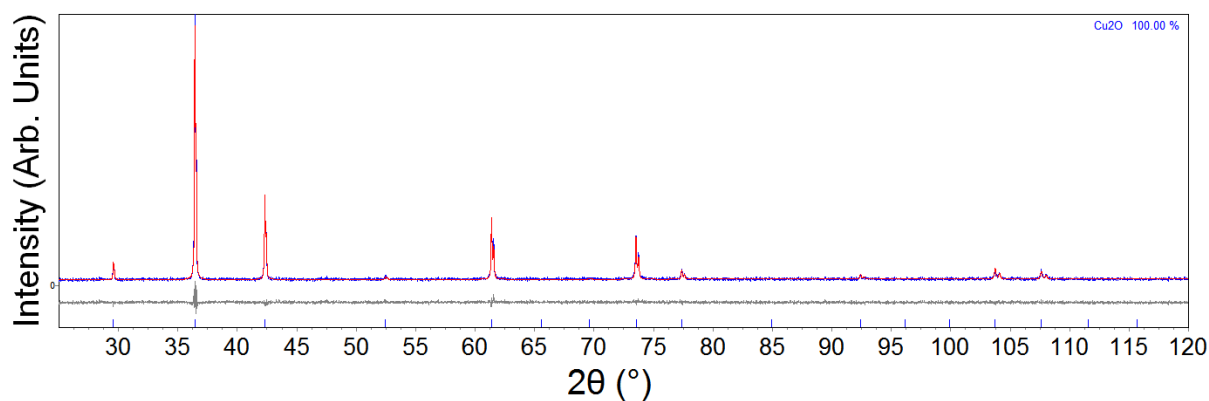

**Figure S4:** X-ray diffraction data of untreated commercial Cu<sub>2</sub>O after whole powder pattern decomposition fitting.

**Table S3:** Whole pattern decomposition fitting results for untreated commercial Cu<sub>2</sub>O.

| Phase Name                            | Cu <sub>2</sub> O (100%) |                      |
|---------------------------------------|--------------------------|----------------------|
| R-Bragg                               | 2.254                    |                      |
| Space group                           | Pn-3m                    |                      |
| Cell Volume                           | 77.8151(43)              | (Å <sup>3</sup> )    |
| Crystallite size (Lvol-IB)            | 162.3(31)                | (nm)                 |
| Crystal Linear Absorption Coefficient | 289.113(16)              | (1/cm)               |
| Crystal Density                       | 6.10704(33)              | (g/cm <sup>3</sup> ) |
| Lattice Parameters                    | a                        | 4.269280(78) (Å)     |

### 1.3. Cu 2p XPS signal of as-grown Cu<sub>2</sub>O nanostructures and H<sub>2</sub>O<sub>2</sub>-treated CuO nanostructures

X-ray photoelectron spectroscopy (Fig S5) confirms that the as-synthesised nanostructures were Cu<sub>2</sub>O. These were oxidised to CuO after H<sub>2</sub>O<sub>2</sub> treatment.<sup>6, 7</sup>

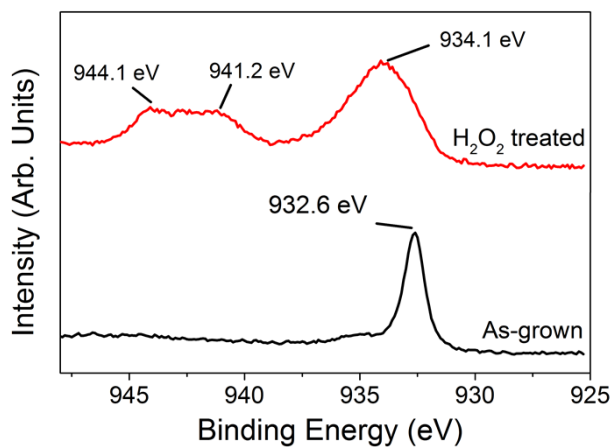

**Figure S5:** XPS spectra for Cu<sub>2</sub>O nanostructures (black trace) and H<sub>2</sub>O<sub>2</sub>-treated CuO nanostructures (red trace). The satellite shakeup peaks between 941 to 945 eV belonging to CuO can only be observed on the H<sub>2</sub>O<sub>2</sub>-treated CuO nanostructures.

## 2. Scanning electron microscopy of Cu<sub>2</sub>O nanostructures exposed to heat treatment at 400 °C for 1 hour

Cu<sub>2</sub>O nanostructures that have been heat treated at 400°C in air for 1 hr oxidised to 200-300 nm sized CuO cuboids (Figure S6a-b).

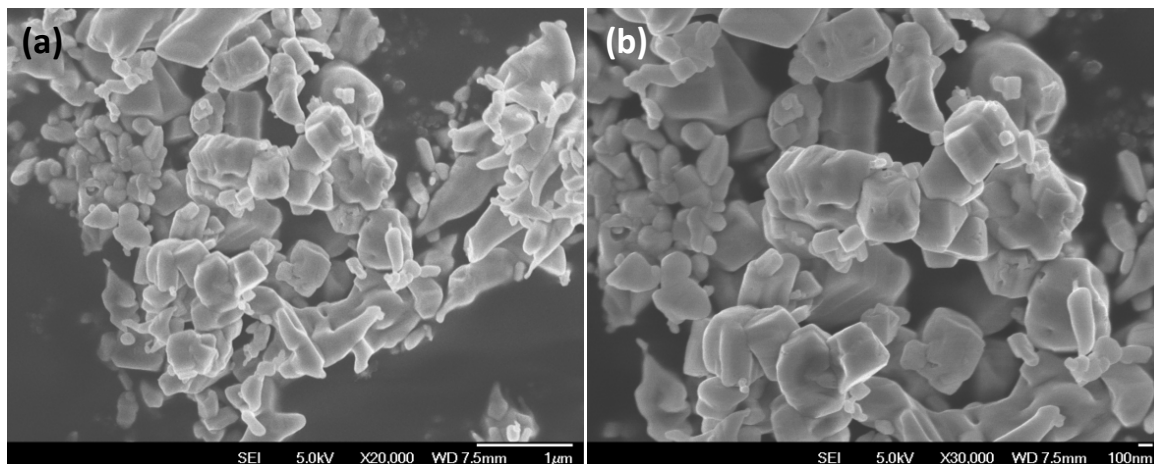

**Figure S6:** (a and b) Cu<sub>2</sub>O nanostructures after heat treatment at 400 °C for 1 hour.

A quantitative analysis of the XRD data of heat treated Cu<sub>2</sub>O nanostructures was performed (Figure S7 and Table S4). Only CuO phase was detected. The literature was consulted to obtain reference cell data for CuO.<sup>4</sup> The blue, red and grey lines represent observed XRD data, calculated pattern from the reference data, and difference plot respectively.

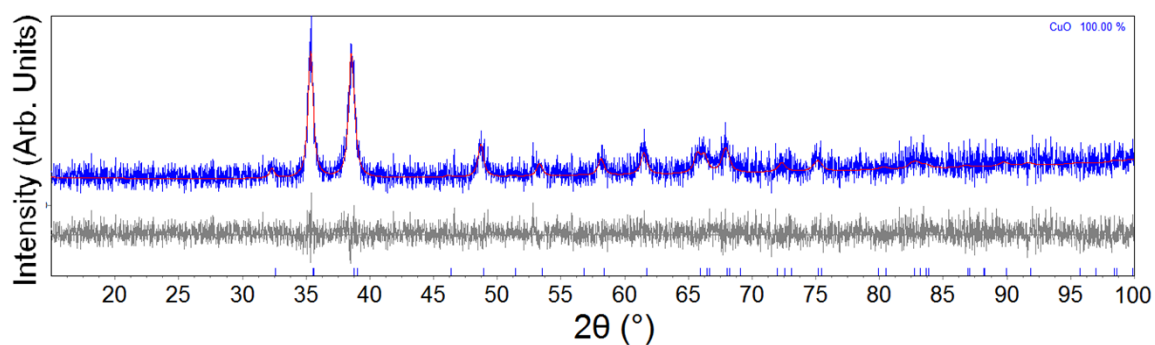

**Figure S7:** X-ray diffraction data of heat-treated Cu<sub>2</sub>O nanostructures after whole powder pattern decomposition fitting.

**Table S4:** Whole pattern decomposition fitting results for Cu<sub>2</sub>O nanostructures after heat treatment at 400 °C for 1 hour.

| Phase Name                            | CuO (100%) |                      |     |
|---------------------------------------|------------|----------------------|-----|
| R-Bragg                               | 2.867      |                      |     |
| Space group                           | C1c1       |                      |     |
| Cell Volume                           | 80.75(10)  | (Å <sup>3</sup> )    |     |
| Crystallite size (Lvol-IB)            | 19.3(10)   | (nm)                 |     |
| Crystal Linear Absorption Coefficient | 286.16(36) | (1/cm)               |     |
| Crystal Density                       | 6.5429(83) | (g/cm <sup>3</sup> ) |     |
| Lattice Parameters                    | a          | 4.6709(32)           | (Å) |
|                                       | b          | 3.4227(27)           | (Å) |
|                                       | c          | 5.1190(37)           | (Å) |
|                                       | β          | 99.338(31)           | °   |

### 3. Characterisation of electrodeposited metallic Cu

A representative scanning electron microscopy image of the electrodeposited metallic Cu is shown in Figure S8.

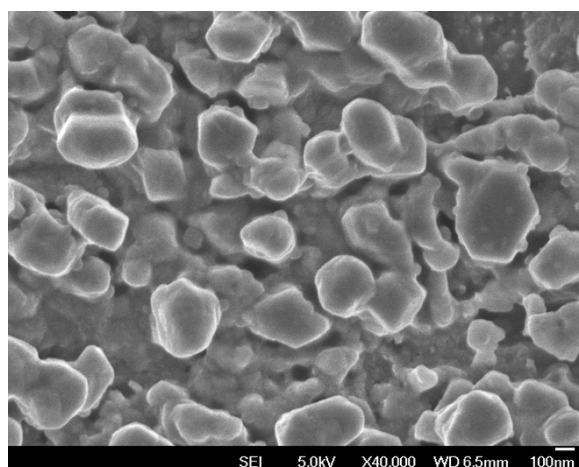

**Figure S8:** SEM image of electrodeposited Cu

A quantitative analysis of the XRD data of electrodeposited Cu was performed (Figure S9 and Table S5). Reference data for metallic Cu was taken from literature.<sup>5</sup> Only metallic Cu peaks were detected. The blue, red and grey lines represent observed XRD data, calculated pattern from the reference data, and difference plot respectively.

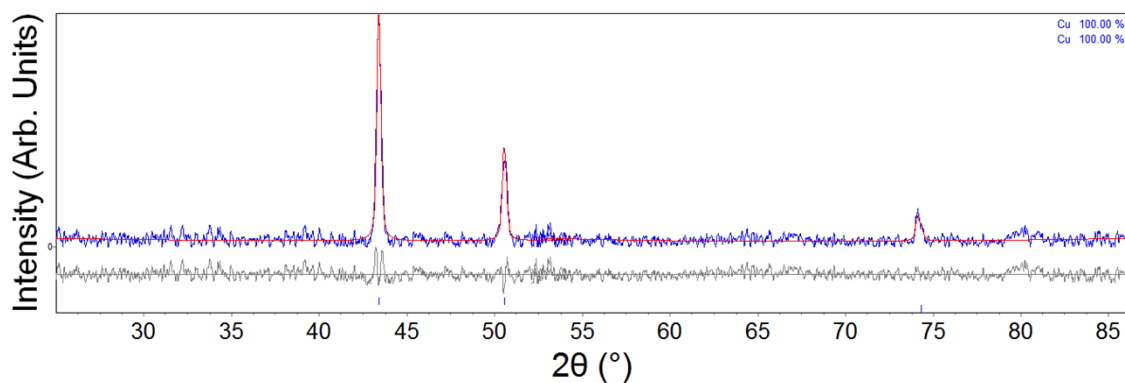

**Figure S9:** X-ray diffraction data of electrodeposited Cu. The diffraction data was collected with Bruker Discover D8 with GADDS area detector at two different detector positions.



**Table S5:** Whole pattern decomposition fitting results for electrodeposited Cu.

| <b>Phase Name</b>                     | <b>Cu (100%)</b> |                      |
|---------------------------------------|------------------|----------------------|
| R-Bragg                               | 2.695            |                      |
| Space group                           | Fm-3m            |                      |
| Cell Volume                           | 46.96(9)         | (Å <sup>3</sup> )    |
| Crystallite size (Lvol-IB)            | 76(3)            | (nm)                 |
| Crystal Linear Absorption Coefficient | 466.1(9)         | (1/cm)               |
| Crystal Density                       | 8.99(2)          | (g/cm <sup>3</sup> ) |
| Lattice Parameters                    | a   3.608(2)     | (Å)                  |

#### 4. Online electrochemical mass spectrometry

Online electrochemical mass spectrometry was used to analyse gaseous products liberated from  $\text{H}_2\text{O}_2$ -treated CuO nanostructured films held at 1.75 V. The design of the cell was adapted from the work of Koper et al.<sup>8</sup> The probe was fitted with a porous PTFE membrane (Porex<sup>®</sup> PM2010, 15-25  $\mu\text{m}$  pore size, 50-60% porosity). It was mounted  $\sim 0.5$  mm away from the anode in order to minimise the time delay due to mass transfer of  $\text{O}_2$ . A mass spectrometer (ThermoStar GSD 320 T1, Pfeiffer Vacuum) was used for analysing the gaseous products. Time resolved measurements of oxygen demonstrated significant increase of  $\text{O}_2$  after OER was started (mass 32, Figure S10a). Similar conclusion can be drawn by comparing  $\text{O}_2$  concentration before and during OER using wide mass survey scan (Figure S10b).

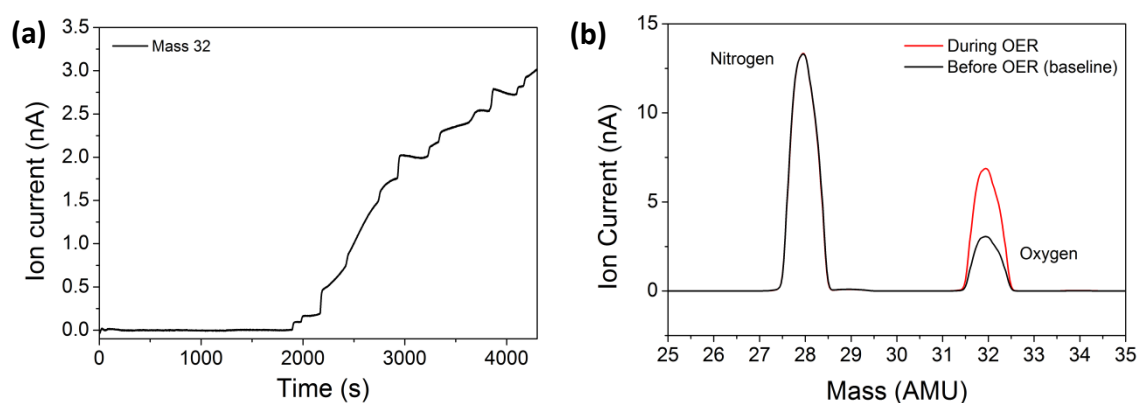

**Figure S10:** Online mass spectrometry results of  $\text{H}_2\text{O}_2$ -treated CuO nanostructures: (a) time resolved monitoring of oxygen (mass 32) and (b) wide survey scan comparison between nitrogen (mass 28) and oxygen (mass 32) before and during OER.

## 5. Calculation of turnover frequencies (TOF) of O<sub>2</sub> production

The turnover frequency in this work is defined as the number of O<sub>2</sub> molecules evolved per active site per second. We assume that four electrons are required to form one O<sub>2</sub> molecule, and that all metal atoms present are catalytic- active. Taking the case of CuO, its TOF can be calculated as:

$$TOF_{CuO} = \frac{\left[ \frac{i}{4 \cdot e} \right]}{\left[ \frac{m_{CuO} \cdot N_A}{MW_{CuO}} \right]} s^{-1}$$

where

$i$  is the current (in Ampere);

$e$  is the electric charge carried by a single electron constant ( $1.602176565 \times 10^{-19}$  C);

$m_{CuO}$  is the weight loading of CuO catalyst;

$N_A$  is the Avogadro's constant ( $6.02214129 \times 10^{23}$  mol<sup>-1</sup>);

$MW_{CuO}$  is the molecular weight of CuO catalyst ( $79.545$  g mol<sup>-1</sup>).

Sample calculations: Taking H<sub>2</sub>O<sub>2</sub>-treated CuO nanostructures as an example. The measured current at 1.75 V vs. RHE (taken from Figure 2b at 2200 s) is  $2.508 \times 10^{-4}$  A.

The total number of oxygen evolution reactions that have occurred per second, assuming 4 electrons are transferred for each reaction is  $\frac{2.508 \times 10^{-4} A}{4 \times 1.602 \times 10^{-19} C} = 3.914 \times 10^{14} s^{-1}$

The weight loading of CuO catalyst is  $1.786 \times 10^{-5}$  g.

The number of Cu sites in the H<sub>2</sub>O<sub>2</sub>-treated CuO nanostructures is

$$\frac{1.786 \times 10^{-5} g \times 6.022 \times 10^{23} mol^{-1}}{79.545 g \cdot mol^{-1}} = 1.352 \times 10^{17}$$

Assuming that the all Cu atoms participated in the OER, the TOF is therefore  $\frac{3.914 \times 10^{14}}{1.352 \times 10^{17}} =$

$2.895 \times 10^{-3} s^{-1}$ .

The TOFs for Cu and Cu<sub>2</sub>O catalysts can be similarly calculated. The TOF values calculated for all catalysts used in this work are compared with the values found or calculated from the literature (Table S6).

**Table S6:** TOF values of various catalysts in the literature and in this work. CA: chronoamperometry, LSV: linear sweep voltammetry.

| Ref.                                | Catalyst                                                  | Current (A)           | TOF (s <sup>-1</sup> ) | Note                                           | Current (A)           | TOF (s <sup>-1</sup> ) | Note                                                 |
|-------------------------------------|-----------------------------------------------------------|-----------------------|------------------------|------------------------------------------------|-----------------------|------------------------|------------------------------------------------------|
| <b>This work</b>                    | H <sub>2</sub> O <sub>2</sub> -treated CuO nanostructures | 2.51×10 <sup>-4</sup> | 2.90×10 <sup>-3</sup>  | Fig 2b and Fig 2d, η=520 mV                    | 2.85×10 <sup>-5</sup> | 3.30×10 <sup>-4</sup>  | Fig 2a, η = 400 mV                                   |
|                                     |                                                           | 2.44×10 <sup>-4</sup> | 2.82×10 <sup>-3</sup>  |                                                | 2.72×10 <sup>-5</sup> | 3.14×10 <sup>-4</sup>  | Fig S12, η = 400 mV                                  |
|                                     |                                                           | 2.05×10 <sup>-4</sup> | 2.37×10 <sup>-3</sup>  |                                                | 2.35×10 <sup>-5</sup> | 2.71×10 <sup>-4</sup>  | Fig S12, η = 400 mV                                  |
| <b>This work</b>                    | Cu <sub>2</sub> O nanostructures (precursor)              | 5.81×10 <sup>-5</sup> | 6.02×10 <sup>-4</sup>  | Fig 2b and Fig 2d, η=520 mV                    | 9.55×10 <sup>-6</sup> | 9.90×10 <sup>-5</sup>  | Fig 2a, η = 400 mV                                   |
|                                     |                                                           | 5.70×10 <sup>-5</sup> | 5.91×10 <sup>-4</sup>  |                                                | 9.28×10 <sup>-6</sup> | 9.63×10 <sup>-5</sup>  | LSV data not shown, η = 400 mV                       |
|                                     |                                                           | 4.12×10 <sup>-5</sup> | 4.28×10 <sup>-4</sup>  |                                                | 9.35×10 <sup>-6</sup> | 9.70×10 <sup>-5</sup>  |                                                      |
| <b>This work</b>                    | Cu <sub>2</sub> O (Commercial)                            | 9.01×10 <sup>-6</sup> | 9.33×10 <sup>-5</sup>  | Fig 2b and Fig 2d, η=520 mV                    | 2.66×10 <sup>-6</sup> | 2.80×10 <sup>-5</sup>  | Fig 2a, η = 400 mV                                   |
|                                     |                                                           | 9.93×10 <sup>-6</sup> | 1.03×10 <sup>-4</sup>  |                                                | 1.87×10 <sup>-6</sup> | 1.94×10 <sup>-5</sup>  | LSV data not shown, η = 400 mV                       |
|                                     |                                                           | 1.34×10 <sup>-5</sup> | 1.39×10 <sup>-4</sup>  |                                                | 1.98×10 <sup>-6</sup> | 2.06×10 <sup>-5</sup>  |                                                      |
| <b>This work</b>                    | Electro deposited Cu                                      | 1.07×10 <sup>-5</sup> | 6.04×10 <sup>-5</sup>  | Fig 2b and Fig 2d, η=520 mV                    | 7.27×10 <sup>-7</sup> | 4.11×10 <sup>-6</sup>  | Fig 2a, η = 400 mV                                   |
|                                     |                                                           | 7.65×10 <sup>-6</sup> | 4.32×10 <sup>-5</sup>  |                                                | 1.63×10 <sup>-6</sup> | 9.18×10 <sup>-6</sup>  | LSV data not shown, η = 400 mV                       |
|                                     |                                                           | 7.52×10 <sup>-6</sup> | 4.25×10 <sup>-5</sup>  |                                                | 1.99×10 <sup>-6</sup> | 1.12×10 <sup>-5</sup>  |                                                      |
| <b>Kumar et al.</b> <sup>9</sup>    | Cu/Glassy carbon                                          | 1.9×10 <sup>-5</sup>  | 2.8×10 <sup>-5</sup>   | Fig 13a. BET surface area, η=520 mV            | 7.2×10 <sup>-6</sup>  | 1.1×10 <sup>-5</sup>   | Fig 13a. BET surface area, η = 400 mV                |
| <b>Kumar et al.</b> <sup>10</sup>   | Cu <sub>2</sub> O/Glassy carbon                           | 1.8×10 <sup>-4</sup>  | 5.0×10 <sup>-5</sup>   | Fig 8, η=520 mV                                | 1.1×10 <sup>-4</sup>  | 3.1×10 <sup>-5</sup>   | Fig 8, η = 400 mV                                    |
| <b>Kanan et al.</b> <sup>11</sup>   | Co Pi                                                     | ~8×10 <sup>-4</sup>   | N.A.                   | Fig. 1b, η=473 mV                              | N.A.                  | ≥7×10 <sup>-4</sup>    | Obtained from Jiao & Frei <sup>12</sup> , η = 410 mV |
| <b>Rasiyah et al.</b> <sup>13</sup> | Co <sub>3</sub> O <sub>4</sub>                            | N.A.                  | N.A.                   | N.A.                                           | N.A.                  | ≥8×10 <sup>-4</sup>    | Obtained from Jiao & Frei <sup>12</sup> , η = 414 mV |
| <b>Iwakura et al.</b> <sup>14</sup> | Co/Co <sub>3</sub> O <sub>4</sub>                         | N.A.                  | N.A.                   | N.A.                                           | 5.1×10 <sup>-3</sup>  | 5.5×10 <sup>-4</sup>   | Fig 3, η = 400 mV                                    |
| <b>Fekete et al.</b> <sup>15</sup>  | β-MnO <sub>2</sub> nano                                   | 3.9×10 <sup>-3</sup>  | 9.0×10 <sup>-4</sup>   | Fig 6b. Estimated loading 0.986 mg, η = 520 mV | 1.8×10 <sup>-3</sup>  | 4.2×10 <sup>-4</sup>   | Fig 6b. Estimated loading 0.986 mg, η = 400 mV       |
| <b>Kim et al.</b> <sup>16</sup>     | CaMn <sub>2</sub> O <sub>5</sub> /C                       | 9.8×10 <sup>-5</sup>  | 5.8×10 <sup>-4</sup>   | Fig S3a. Scan 9. Loading 0.05mg, η = 520 mV    | 3.9×10 <sup>-5</sup>  | 2.3×10 <sup>-4</sup>   | Fig S3a. Scan 9. Loading 0.05mg, η = 400 mV          |

## 6. H<sub>2</sub>O<sub>2</sub> treatment of Cu disc electrodes.

The H<sub>2</sub>O<sub>2</sub> treatment can also be used to enhance the OER activity of pristine Cu discs (10 mm diameter, Fig S11). The H<sub>2</sub>O<sub>2</sub>-treated Cu discs also exhibited a more stable O<sub>2</sub>-evolving catalytic activity.

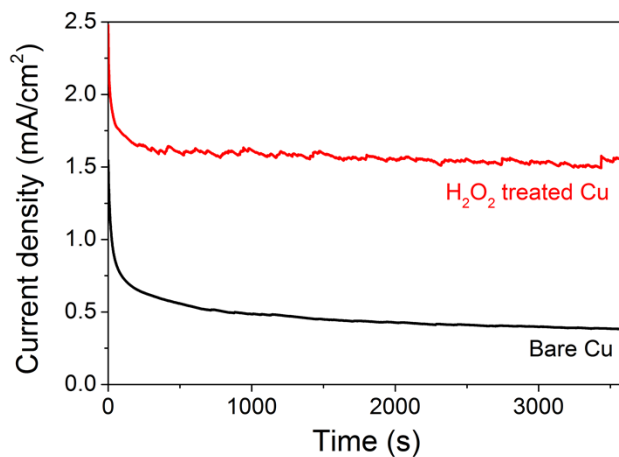

**Figure S11:** Chronoamperograms of bare 10 mm Cu disc before (black trace) and after five cycles of H<sub>2</sub>O<sub>2</sub> treatments (red trace). Potential applied: 1.75 V. Electrolyte: 0.1 M KOH.

## 7. Surface area of catalysts

The surface areas of the electrodes were determined by both the double layer capacitance method and Brunauer–Emmett–Teller (BET) method.

Double layer capacitance method: Cyclic voltammetry curves of the electrodes were recorded at scan rates between 0.02 and 0.3 V s<sup>-1</sup>. The capacitive current density was plotted as a function of scan rate, which gave a linear plot. C<sub>dl</sub> values of 28 and 60 μF cm<sup>-2</sup> were respectively used for an ideally smooth metal surface and an oxide surface.<sup>17-19</sup> The slope of the plot/C<sub>dl</sub> μF cm<sup>-2</sup> gives the roughness factor (R<sub>F</sub>) of the surface. The electrochemically determined surface area is then given by R<sub>F</sub> × geometric surface area (0.0707 cm<sup>2</sup>). The calculated values are summarised in Table S7.

Brunauer–Emmett–Teller (BET) method: The surface areas of the powder samples were measured on a Micromeritics ASAP 2020 at 77 K. The samples were degassed at 460 K prior to N<sub>2</sub> sorption. The measured values are summarised in Table S7.

**Table S7:** Tabulation of surface areas determined by the double layer capacitance method and BET method.

| Catalyst                                                  | Capacitance (mF/cm <sup>2</sup> ) | Surface roughness factor (R <sub>F</sub> ) | EC-determined surface area (cm <sup>2</sup> ) | BET data (m <sup>2</sup> /g) | BET surface area (cm <sup>2</sup> ) | BJH Ads average pore diameter (nm) |
|-----------------------------------------------------------|-----------------------------------|--------------------------------------------|-----------------------------------------------|------------------------------|-------------------------------------|------------------------------------|
| Commercial Cu <sub>2</sub> O                              | 0.076                             | 1.26                                       | 0.09                                          | 6.06                         | 1.08                                | 12.65                              |
| Cu <sub>2</sub> O nanostructures (untreated)              | 0.073                             | 1.21                                       | 0.09                                          | 6.19                         | 1.1                                 | 8.43                               |
| H <sub>2</sub> O <sub>2</sub> -treated CuO nanostructures | 0.094                             | 1.56                                       | 0.11                                          | 17.63                        | 3.16                                | 32.82                              |
| Electrodeposited Cu                                       | 0.087                             | 3.10                                       | 0.22                                          | -                            | -                                   | -                                  |
| Heat treated CuO nanostructures                           | 0.065                             | 1.08                                       | 0.08                                          | 5.20                         | 0.93                                | 37.60                              |

Considering the data given by both methods, the surface areas of the Cu catalysts varied within a factor of 3. Note that the electrochemical determined surface areas are smaller than that of the BET determined surface areas. This can be attributed to the lower electrochemical accessibility of the metal or metal oxide sites due to obstruction by the Nafion binder.<sup>20</sup>

## 8. Linear scanning voltammetry of H<sub>2</sub>O<sub>2</sub>-treated CuO nanostructures

The stability of H<sub>2</sub>O<sub>2</sub>-treated CuO nanostructures was also assessed by consecutive linear scanning voltammetry scans from 1 to 1.75 V (Fig S12). The H<sub>2</sub>O<sub>2</sub>-treated CuO nanostructures were stable under the test conditions, which took about 2 hours.

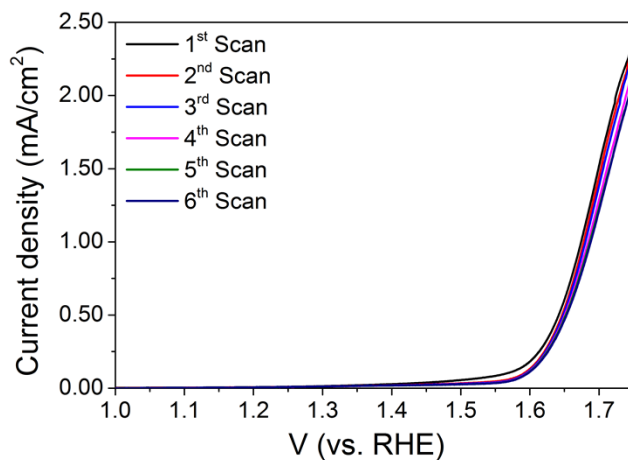

**Figure S12:** Multiple LSV curves of H<sub>2</sub>O<sub>2</sub>-treated CuO nanostructures. The six consecutive LSV scans were performed over ~2 hours. Scan rate: 1 mV/s. Electrolyte: 0.1 M KOH.

## 9. Raman data and Raman peak assignments.

The Raman spectra of the Cu<sub>2</sub>O nanostructure precursors and H<sub>2</sub>O<sub>2</sub>-treated CuO nanostructures were measured and presented in Figure S13a. Peaks corresponding to Cu<sub>2</sub>O and CuO were observed (Table S8 and S9).

CuO films formed by the anodic oxidation of a Cu substrate in KOH electrolyte were also studied.<sup>21</sup> No other inorganic or organic reagents were used in the synthesis. The transient Raman peak at 603 cm<sup>-1</sup> was also observed on this CuO film (Figure S13b). This eliminates the possibility that the Raman vibration at 603 cm<sup>-1</sup> originates from reagents used in the synthesis of the CuO nanostructures.

The Raman peaks observed in this work are compared with previous values, and summarised in Tables S8 and S9.

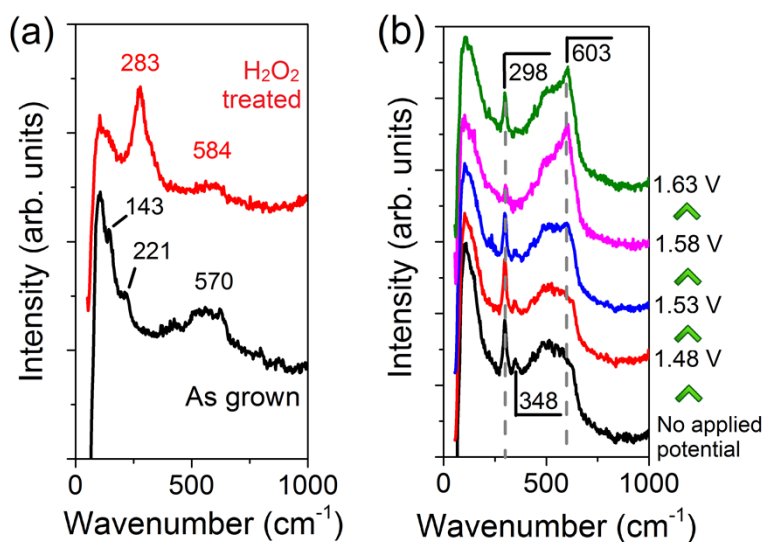

**Figure S13:** (a) Raman spectra (taken in air) of the Cu<sub>2</sub>O precursor and H<sub>2</sub>O<sub>2</sub>-treated CuO nanostructures; (b) In-situ Raman spectra of CuO grown by electro-oxidation of Cu metal in KOH.

**Table S8:** Raman frequencies of Cu<sub>2</sub>O. <sup>§</sup>: this work.

| Sample                                                                                        | Frequencies (cm <sup>-1</sup> ) |     |     |     |     |
|-----------------------------------------------------------------------------------------------|---------------------------------|-----|-----|-----|-----|
| Cu <sub>2</sub> O nanostructures without applied potential and at 1.48V, Fig. 3c <sup>§</sup> | 143                             | 221 |     | 540 | 620 |
| Cu <sub>2</sub> O nanostructures (measured in air), Fig. S13a <sup>§</sup>                    | 143                             | 221 |     | 570 |     |
| Anodically-formed Cu <sub>2</sub> O film <sup>22</sup>                                        | 145                             | 214 |     |     | 644 |
| Electrodeposited Cu film on Pt disc <sup>22</sup>                                             | 150                             | 222 | 528 | 581 | 623 |



**Table S9:** Raman frequencies of CuO. <sup>§</sup>: this work.

| Sample                                                                                                                      |     | Frequencies (cm <sup>-1</sup> ) |         |         |
|-----------------------------------------------------------------------------------------------------------------------------|-----|---------------------------------|---------|---------|
| H <sub>2</sub> O <sub>2</sub> -treated CuO nanostructures without applied potential and at 1.48-1.53 V, Fig 3a <sup>§</sup> |     | 298                             | 343     | 612     |
| H <sub>2</sub> O <sub>2</sub> -treated CuO nanostructures (measured in air), Fig. S13a <sup>§</sup>                         |     | 283                             |         | 584-592 |
| CuO nanobelt powders <sup>23</sup>                                                                                          |     | 282                             | 337     | 613     |
| CuO nanocrystals <sup>24</sup>                                                                                              |     | 288-295                         | 330-342 | 621-628 |
| CuO electrodeposited on Cu disc <sup>25</sup>                                                                               | 250 | 300                             | 347     | 635     |

## 10. Synthesis and characterisation of Cu<sup>III</sup>-containing NaCuO<sub>2</sub>

NaCuO<sub>2</sub> was synthesised according to the procedure reported by Ono et al.<sup>26</sup>. The XRD and whole powder decomposition fitting data are presented respectively in Fig S14 and Table S10. The reference crystallographic data of NaCuO<sub>2</sub> was taken from the literature.<sup>27</sup> The blue, red and grey lines represent observed XRD data, calculated pattern from the reference data, and difference plot respectively. NaCuO<sub>2</sub> is observed together with small amounts of CuO.

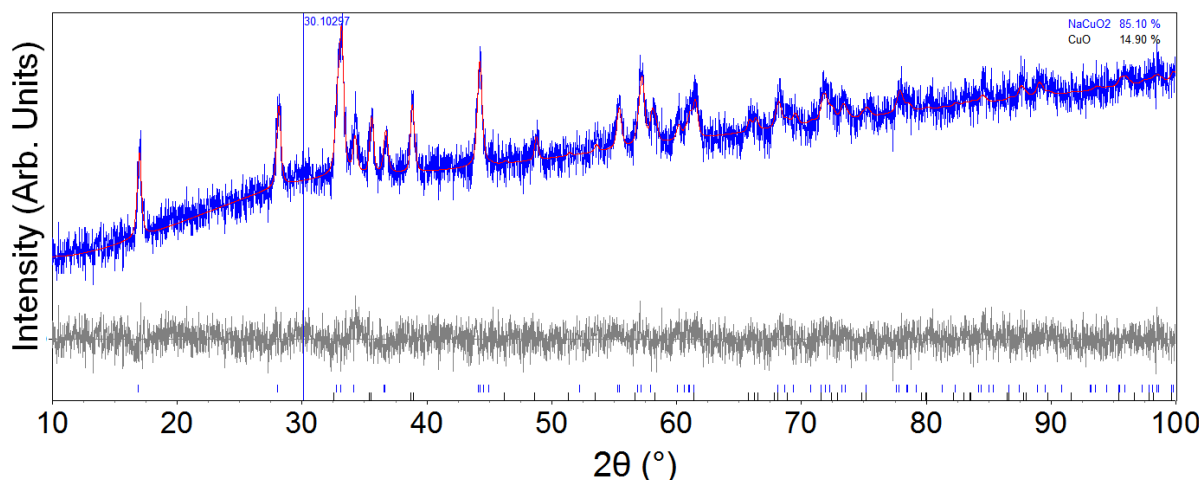

**Figure S14:** X-ray diffraction data of NaCuO<sub>2</sub> after whole powder pattern decomposition fitting.

**Table S10:** Whole pattern decomposition fitting results for NaCuO<sub>2</sub> and CuO powder mixture.

|                                       |                                    |                      |     |
|---------------------------------------|------------------------------------|----------------------|-----|
| <b>Phase 1 Name</b>                   | <b>NaCuO<sub>2</sub> 85.0(5) %</b> |                      |     |
| R-Bragg                               | 2.708                              |                      |     |
| Space group                           | C2/m                               |                      |     |
| Cell Volume                           | 91.888(48)                         | (Å <sup>3</sup> )    |     |
| Crystallite size (LVol-IB)            | 20.49(56)                          | (nm)                 |     |
| Crystal Linear Absorption Coefficient | 136.218(72)                        | (1/cm)               |     |
| Crystal Density                       | 3.8800(20)                         | (g/cm <sup>3</sup> ) |     |
| Lattice Parameters                    | a                                  | 6.3614(18)           | (Å) |
|                                       | b                                  | 2.75231(73)          | (Å) |
|                                       | c                                  | 6.1091(20)           | (Å) |
|                                       | β                                  | 120.787(14)          | °   |
| <b>Phase 2 Name</b>                   | <b>CuO 15.0(5) %</b>               |                      |     |
| R-Bragg                               | 1.622                              |                      |     |
| Space group                           | C1c1                               |                      |     |
| Cell Volume                           | 81.477(86)                         | (Å <sup>3</sup> )    |     |
| Crystallite size (LVol-IB)            | 28.1(26)                           | (nm)                 |     |

|                                       |            |                      |
|---------------------------------------|------------|----------------------|
| Crystal Linear Absorption Coefficient | 283.62(30) | (1/cm)               |
| Crystal Density                       | 6.4847(68) | (g/cm <sup>3</sup> ) |
| Lattice Parameters                    | a          | 4.6884(28) (Å)       |
|                                       | b          | 3.4258(20) (Å)       |
|                                       | c          | 5.1443(32) (Å)       |
|                                       | β          | 99.569(36) °         |

The Raman spectrum of the as-synthesized NaCuO<sub>2</sub> powder exhibited a very strong peak at 603 cm<sup>-1</sup> (Fig S15, black trace). As CuO does not have any Raman peak at 603 cm<sup>-1</sup> (Table S9), this peak must belong to NaCuO<sub>2</sub>. This assignment was further confirmed by the disappearance of the 603 cm<sup>-1</sup> peak when the NaCuO<sub>2</sub> powder was mixed with water (Fig S15, red trace; only the CuO peak was observed at 276 cm<sup>-1</sup>).

The occurrence of the 603 cm<sup>-1</sup> peak from NaCu<sup>III</sup>O<sub>2</sub> supports our assignment of the Raman peak observed on H<sub>2</sub>O<sub>2</sub>-treated CuO nanostructures at ≥1.58 V to Cu<sup>III</sup> oxide species (Fig 3a and Fig S15, blue trace).

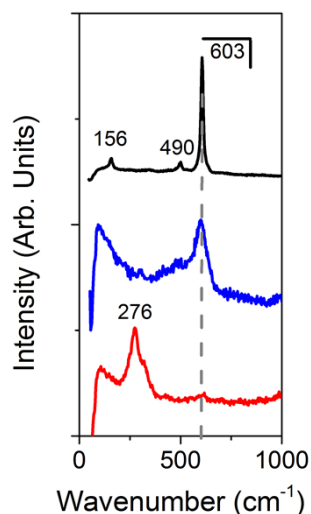

**Figure S15:** Raman spectrum of as-synthesised NaCuO<sub>2</sub> (black trace) showing strong Raman peak at 603 cm<sup>-1</sup>. This coincides with the observed 603 cm<sup>-1</sup> peak on H<sub>2</sub>O<sub>2</sub>-treated CuO nanostructures held at 1.63 V (blue trace). The peak at 603 cm<sup>-1</sup> seen on NaCuO<sub>2</sub> disappeared when water was added to it (red trace).

## References cited in the supporting information:

1. G. Pawley, *J. Appl. Crystallogr.*, 1981, **14**, 357-361.
2. H. Toraya, *Rigaku J.*, 1989, **6**, 28-34.
3. A. Kirfel and K. Eichhorn, *Acta Crystallogr. A*, 1990, **46**, 271-284.
4. S. Asbrink and A. Waskowska, *J. Phys.: Condens. Matter*, 1991, **3**, 8173.
5. M. E. Straumanis and L. S. Yu, *Acta Crystallogr. A*, 1969, **25**, 676-682.
6. J. F. Moulder and J. Chastain, *Handbook of X-ray Photoelectron Spectroscopy: A Reference Book of Standard Spectra for Identification and Interpretation of XPS Data*, Physical Electronics Division, Perkin-Elmer Corporation, 1992.
7. M. C. Biesinger, L. W. M. Lau, A. R. Gerson and R. S. C. Smart, *Appl. Surf. Sci.*, 2010, **257**, 887-898.
8. A. H. Wonders, T. H. M. Housmans, V. Rosca and M. T. M. Koper, *J. Appl. Electrochem.*, 2006, **36**, 1215-1221.
9. B. Kumar, S. Saha, M. Basu and A. K. Ganguli, *J. Mater. Chem. A*, 2013, **1**, 4728-4735.
10. B. Kumar, S. Saha, A. Ganguly and A. K. Ganguli, *RSC Adv.*, 2014, **4**, 12043-12049.
11. M. W. Kanan and D. G. Nocera, *Science*, 2008, **321**, 1072-1075.
12. F. Jiao and H. Frei, *Angew. Chem. Int. Ed.*, 2009, **48**, 1841-1844.
13. P. Rasiyah and A. C. C. Tseung, *J. Electrochem. Soc.*, 1983, **130**, 365-368.
14. C. Iwakura, A. Honji and H. Tamura, *Electrochim. Acta*, 1981, **26**, 1319-1326.
15. M. Fekete, R. K. Hocking, S. L. Y. Chang, C. Italiano, A. F. Patti, F. Arena and L. Spiccia, *Energy Environ. Sci.*, 2013, **6**, 2222-2232.
16. J. Kim, X. Yin, K.-C. Tsao, S. Fang and H. Yang, *J. Am. Chem. Soc.*, 2014, **136**, 14646-14649.
17. S. Trasatti and O. A. Petrii, *J. Electroanal. Chem.*, 1992, **327**, 353-376.
18. S. Levine and A. L. Smith, *Discuss. Faraday Soc.*, 1971, **52**, 290-301.
19. J. O. Bockris and T. Otagawa, *J. Phys. Chem.*, 1983, **87**, 2960-2971.
20. P. Staiti, M. Minutoli and F. Lufrano, *Electrochim. Acta*, 2002, **47**, 2795-2800.
21. G. M. Brisard, J. D. Rudnicki, F. McLarnon and E. J. Cairns, *Electrochim. Acta*, 1995, **40**, 859-865.
22. G. Niaura, *Electrochim. Acta*, 2000, **45**, 3507-3519.
23. W. Wang, Q. Zhou, X. Fei, Y. He, P. Zhang, G. Zhang, L. Peng and W. Xie, *CrystEngComm*, 2010, **12**, 2232-2237.
24. J. F. Xu, W. Ji, Z. X. Shen, W. S. Li, S. H. Tang, X. R. Ye, D. Z. Jia and X. Q. Xin, *J. Raman Spectrosc.*, 1999, **30**, 413-415.
25. J. C. Hamilton, J. C. Farmer and R. J. Anderson, *J. Electrochem. Soc.*, 1986, **133**, 739-745.
26. Y. Ono, Y. Yui, K. Asakura, J. Nakamura, M. Hayashi and K. I. Takahashi, *American Journal of Physical Chemistry*, 2014, **3**, 61-66.
27. N. E. Brese, M. O'Keeffe, R. B. Von Dreele and V. G. Young Jr, *J. Solid State Chem.*, 1989, **83**, 1-7.
